# Supplementary material for: ClpB mutants of Francisella tularensis subspecies holarctica and tularensis are defective for type VI secretion and intracellular replication
Source: PubMed Central journal article supplement (PMC6063899; doi:10.1038/s41598-018-29745-4), 2018-07-27
Supplement: 41598_2018_29745_MOESM1_ESM.pdf [file 41598_2018_29745_MOESM1_ESM.pdf]

## Supplementary Information

ClpB mutants of *Francisella tularensis* subspecies *holarctica* and *tularensis* are defective for type VI secretion and intracellular replication

Athar Alam, Igor Golovliov, Eram Javed, Anders Sjöstedt\*

Department of Clinical Microbiology, Umeå University, SE-901 85 Umeå, Sweden.

\***Address correspondence to:** Anders.Sjostedt@umu.se.

This file includes:

1. Supplementary Table.1
2. Supplementary Fig.S1
3. Supplementary Fig.S2

Table S1. Strains and plasmids used in this study

| Strain or plasmid                   | Relevant genotype and/or phenotype                                                                                         | Source or reference |
|-------------------------------------|----------------------------------------------------------------------------------------------------------------------------|---------------------|
| <b><u>F. tularensis strains</u></b> |                                                                                                                            |                     |
| LVS                                 | Live vaccine strain                                                                                                        | FSC <sup>a</sup>    |
| LVS $\Delta clpB$                   | Live vaccine strain, in-frame deletion of <i>clpB</i>                                                                      | 1                   |
| LVS $\Delta iglC$                   | Live vaccine strain, in-frame deletion of <i>iglC</i>                                                                      | 2                   |
| SCHU S4                             | <i>Francisella tularensis</i> subsp. <i>tularensis</i>                                                                     | FSC                 |
| SCHU S4 $\Delta clpB$               | <i>Francisella tularensis</i> subsp. <i>tularensis</i> , in-frame deletion of <i>clpB</i>                                  | 3                   |
| SCHU S4 $\Delta ggt$                | <i>Francisella tularensis</i> subsp. <i>tularensis</i> , in-frame deletion of $\gamma$ -glutamyltransferase ( <i>ggt</i> ) | 4                   |
| <b><u>Plasmids</u></b>              |                                                                                                                            |                     |
| pKK289-GFP                          | Expression plasmid carrying a <i>gfp</i> gene under the control of LVS GroESL promoter, Tet <sup>r</sup>                   | 5                   |
| pJEB709                             | pMOL42 derivative encoding mature TEM $\beta$ -lactamase from <i>E. coli</i> , Km <sup>R</sup>                             | 6                   |
| pJEB733                             | pJEB709, encoding IglC-TEM, Km <sup>R</sup>                                                                                | 6                   |
| pSK003                              | pJEB709, encoding IglE-TEM, Km <sup>R</sup>                                                                                | 6                   |
| pJEB953                             | pJEB709 encoding IglE <sub>FS1(2-6)</sub> -TEM, Km <sup>R</sup>                                                            | 7                   |
| pMOL95                              | pJEB709, encoding VgrG-TEM, Km <sup>R</sup>                                                                                | 6                   |

<sup>a</sup> Obtained from the *Francisella* Strain Collection, Swedish Defence Research Agency, Umeå, Sweden,

## References

- 1 Barrigan, L. M. *et al.* Infection with *Francisella tularensis* LVS *clpB* leads to an altered yet protective immune response. *Infect Immun* 81, 2028-2042, doi:10.1128/IAI.00207-13 (2013).
- 2 Golovliov, I., Sjöstedt, A., Mokrievich, A. & Pavlov, V. A method for allelic replacement in *Francisella tularensis*. *FEMS Microbiol Lett* 222, 273-280. (2003).
- 3 Conlan, J. W. *et al.* Differential ability of novel attenuated targeted deletion mutants of *Francisella tularensis* subspecies *tularensis* strain SCHU S4 to protect mice against aerosol challenge with virulent bacteria: Effects of host background and route of immunization. *Vaccine* 28, 1824-1831, doi:S0264-410X(09)01904-5 [pii]
- 4 Ireland, P. M., LeButt, H., Thomas, R. M. & Oyston, P. C. A *Francisella tularensis* SCHU S4 mutant deficient in gamma-glutamyltransferase activity induces protective immunity: characterization of an attenuated vaccine candidate. *Microbiology* 157, 3172-3179, doi:10.1099/mic.0.052902-0

- 5 Bönquist, L., Lindgren, H., Golovliov, I., Guina, T. & Sjöstedt, A. MglA and Igl proteins contribute to the modulation of *Francisella tularensis* live vaccine strain-containing phagosomes in murine macrophages. *Infect Immun* 76, 3502-3510, doi:10.1128/IAI.00226-08
- 6 Bröms, J. E., Meyer, L., Sun, K., Lavander, M. & Sjöstedt, A. Unique substrates secreted by the type VI secretion system of *Francisella tularensis* during intramacrophage infection. *PLoS One* 7, e50473, doi:10.1371/journal.pone.0050473
- 7 Bröms, J. E., Meyer, L. & Sjöstedt, A. A mutagenesis-based approach identifies amino acids in the N-terminal part of *Francisella tularensis* IglE that critically control Type VI system-mediated secretion. *Virulence*, 1-27, doi:10.1080/21505594.2016.1258507 (2016).

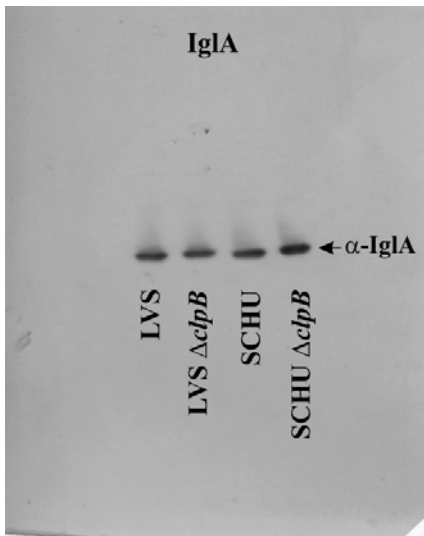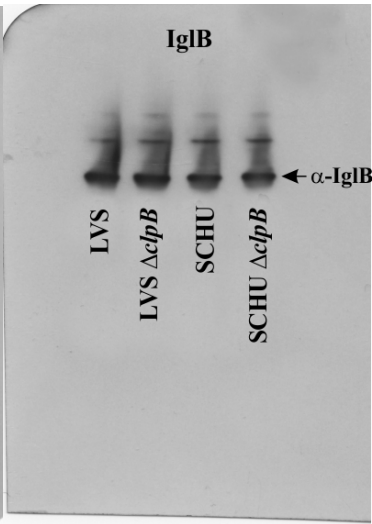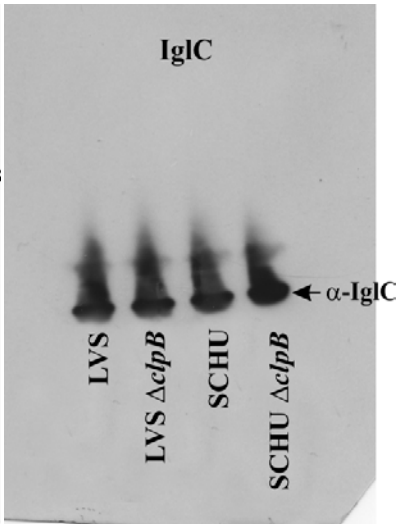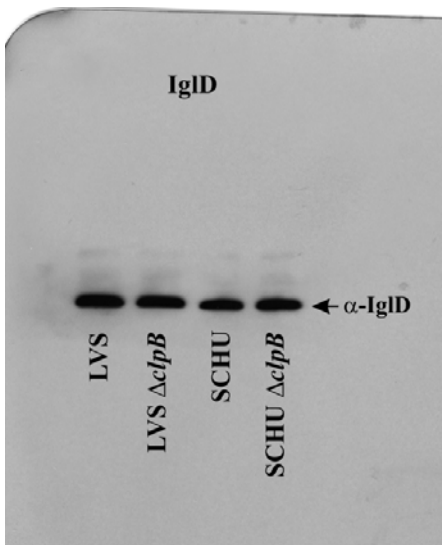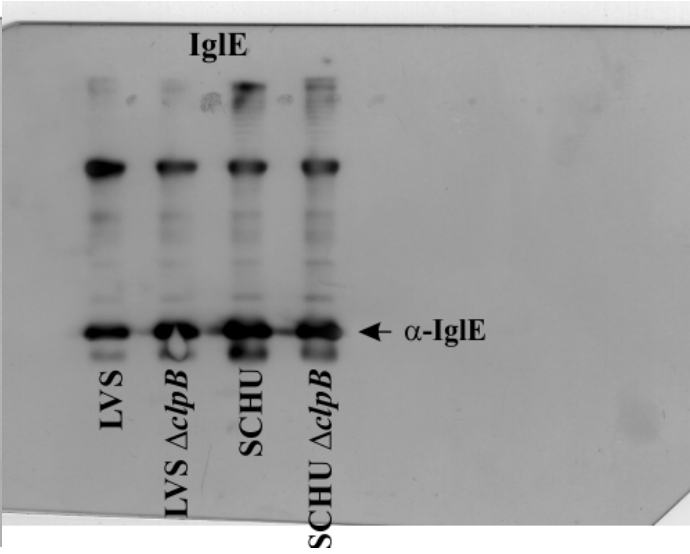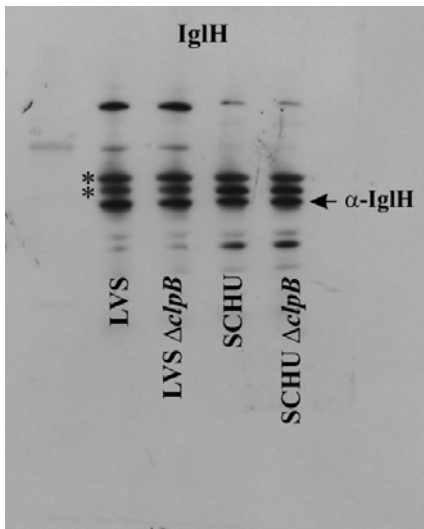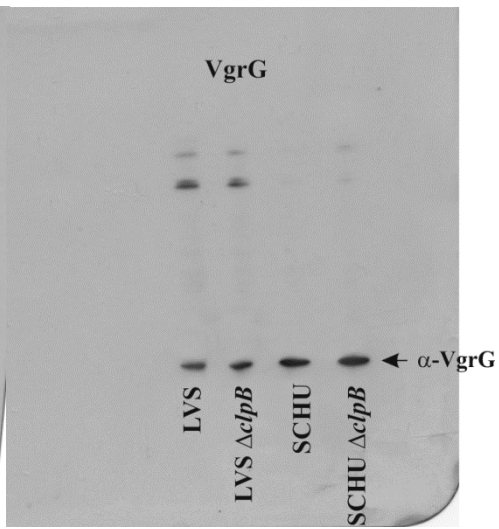

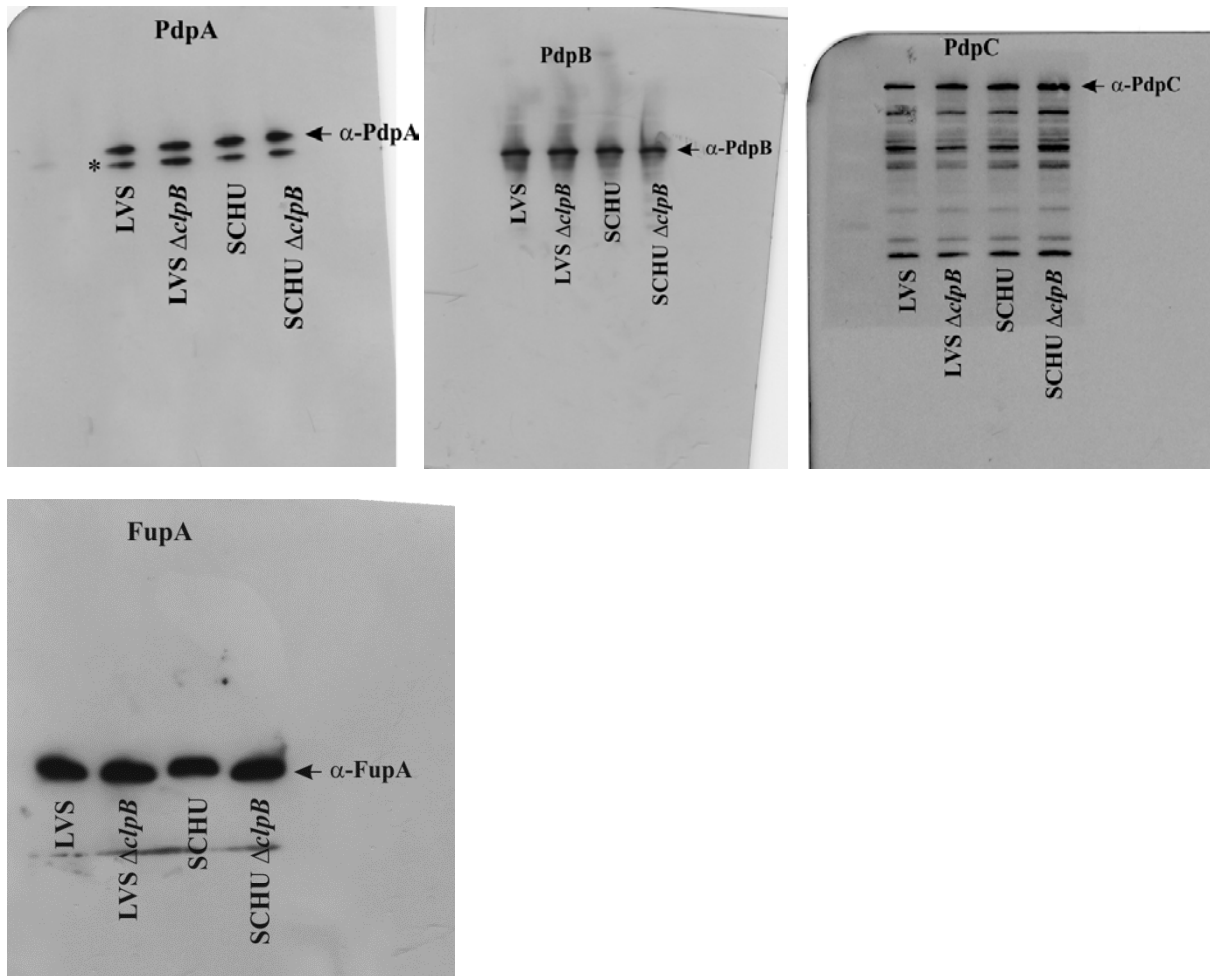

**Fig. S1: Western blot analysis of total levels of FPI proteins of the indicated *F. tularensis* strains.** Whole cell lysates of each strain were prepared, separated on 12 % SDS-PAGE and probed with specific antibodies against indicated FPI proteins. FupA was used as loading control. Assays were repeated at least twice and representative blots are shown.

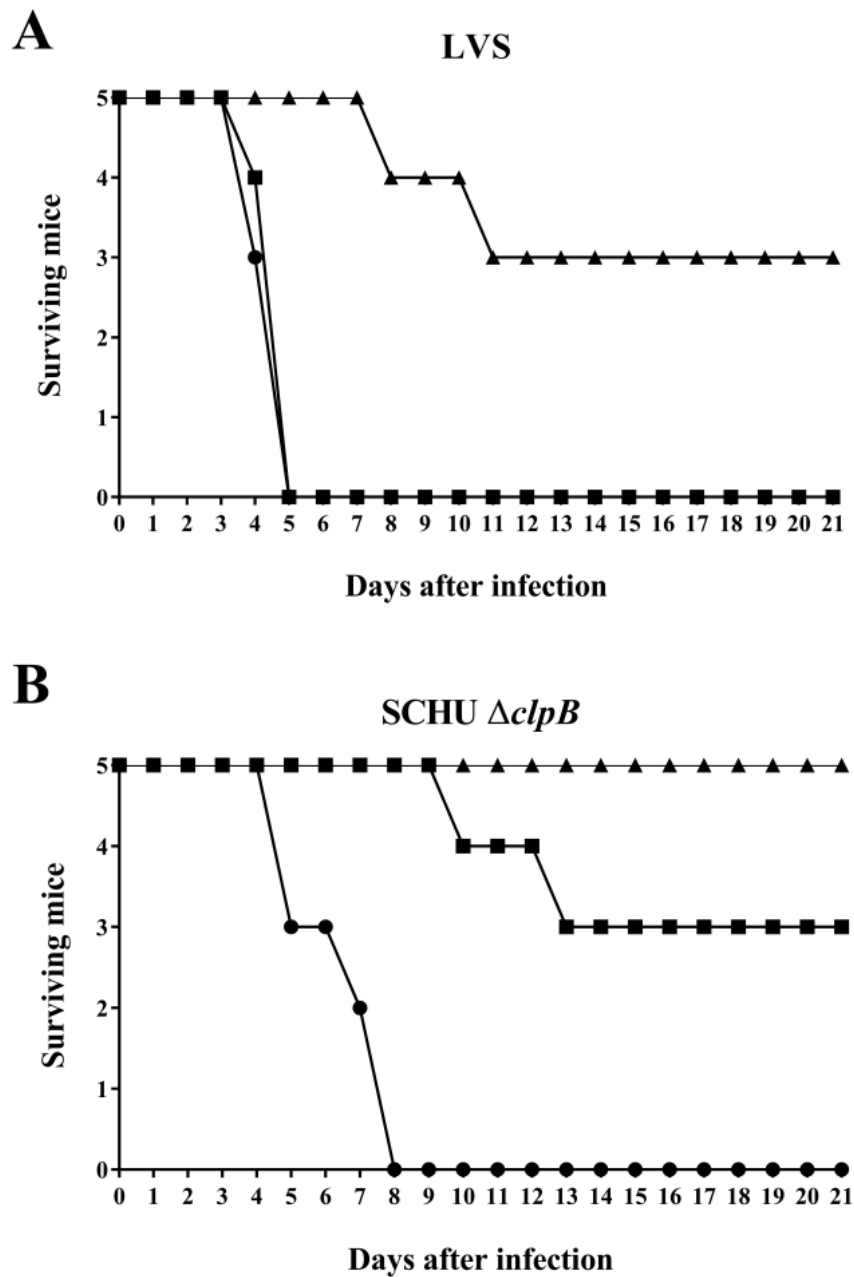

**Fig S2. ClpB is required for lethality in C57BL/6 mice.** Mice were infected intradermally with  $6 \times 10^7$  CFU (circle),  $6 \times 10^6$  CFU (square), or  $7 \times 10^5$  CFU (triangle) of LVS (A); or with  $1 \times 10^8$  CFU (circle),  $8 \times 10^6$  CFU (square), or  $8 \times 10^5$  CFU (triangle) of SCHU S4  $\Delta clpB$  (B). Mice were monitored for signs of morbidity for up to 21 d post infection. The data represents one representative experiment out of 3 where groups of 5 ( $n = 5$ ) mice were used.
